# Supplementary material for: Pyrotinib versus placebo in combination with trastuzumab and docetaxel as first line treatment in patients with HER2 positive metastatic breast cancer (PHILA): randomised, double blind, multicentre, phase 3 trial
Source: PubMed Central journal article supplement — BMJ. 2023 Oct 31;383:e076065. doi: 10.1136/bmj-2023-076065 (PMC10616786; doi:10.1136/bmj-2023-076065), 2023-10-31
Supplement: mafe076065.ww2.pdf [file mafe076065.ww2.pdf]

## Web appendix

### Supplementary tables and figures

Supplement to: Fei Ma, et al. Pyrotinib versus placebo in combination with trastuzumab and docetaxel as first line treatment in patients with HER2 positive metastatic breast cancer (PHILA): a randomised, double blind, multicentre, phase 3 trial

#### Table of contents

|                                                                                                                                               |    |
|-----------------------------------------------------------------------------------------------------------------------------------------------|----|
| Figure S1. Kaplan-Meier curve of investigator-assessed progression-free survival by previous neoadjuvant or adjuvant trastuzumab.....         | 2  |
| Figure S2. Kaplan-Meier curve of investigator-assessed progression-free survival by treatment-free interval of previous adjuvant therapy..... | 3  |
| Table S1. List of participating sites, ethics committees, and approval IDs .....                                                              | 4  |
| Table S2. Interruption of treatment for each component.....                                                                                   | 8  |
| Table S3. Treatment related serious adverse events .....                                                                                      | 9  |
| Table S4. Treatment related adverse events that led to treatment discontinuation .....                                                        | 11 |
| Table S5. Summary of data on diarrhoea .....                                                                                                  | 13 |

### Figure S1. Kaplan-Meier curve of investigator-assessed progression-free survival by previous neoadjuvant or adjuvant trastuzumab

(A) Progression-free survival in patients with previous neoadjuvant or adjuvant trastuzumab. (B) Progression-free survival in patients without previous neoadjuvant or adjuvant trastuzumab. Hazard ratios are from unstratified analyses.

CI=confidence interval; NR=not reached.

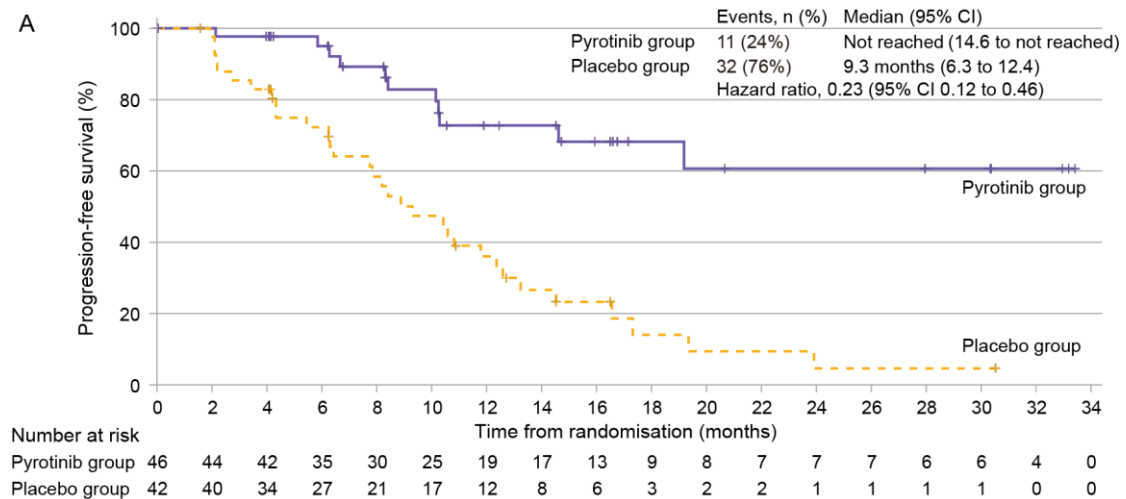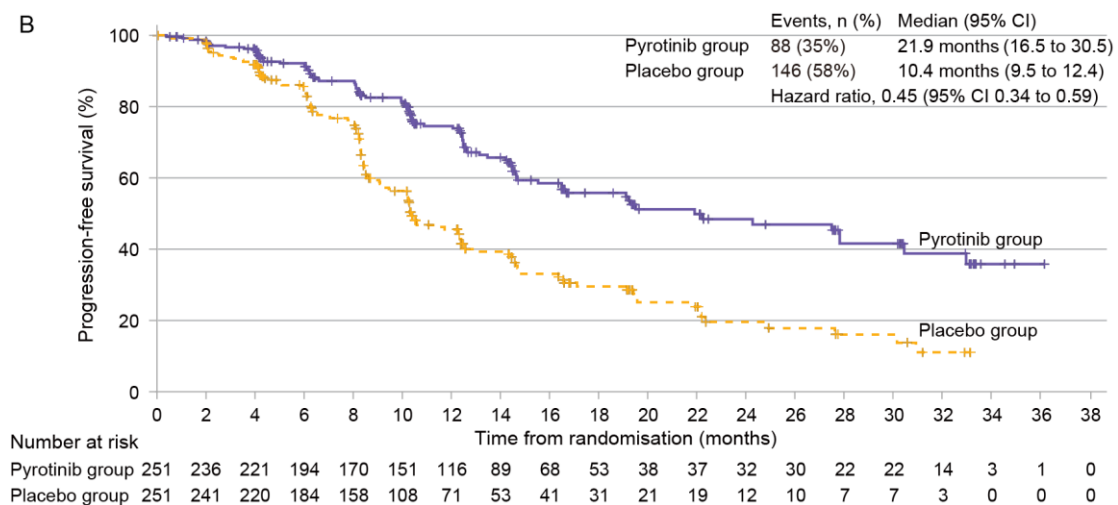

## Figure S2. Kaplan-Meier curve of investigator-assessed progression-free survival by treatment-free interval of previous adjuvant therapy

(A) Progression-free survival in patients who had a treatment-free interval of  $\geq 12$  to  $< 24$  months for previous adjuvant therapy. (B) Progression-free survival in patients who had a treatment-free interval of  $\geq 24$  months for previous adjuvant therapy. Hazard ratios are from unstratified analyses.

CI=confidence interval; NR=not reached.

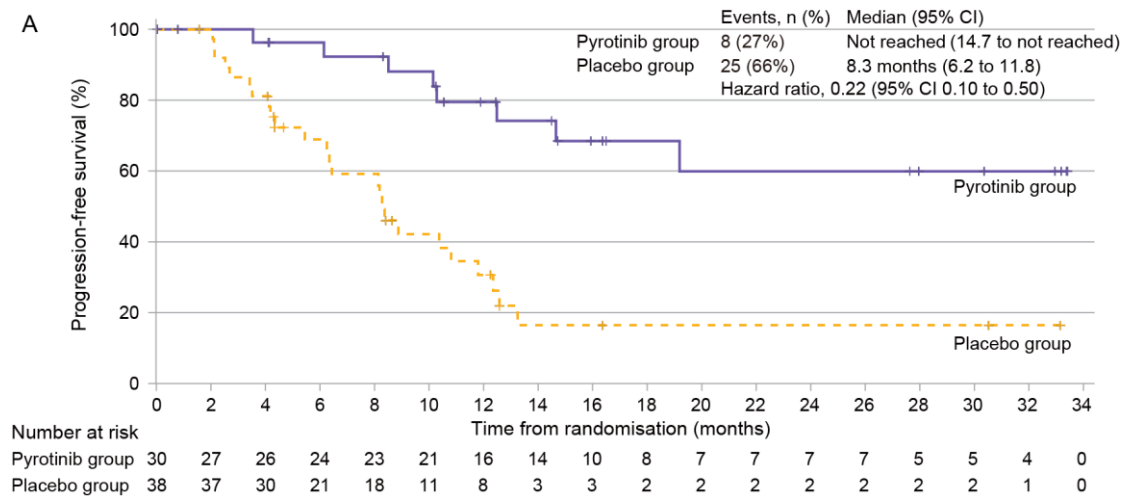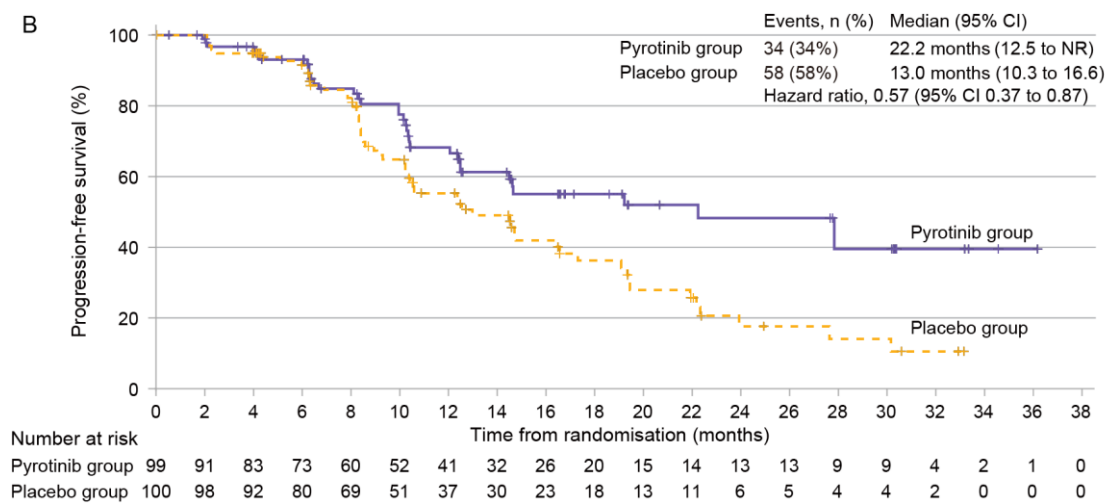

**Table S1. List of participating sites, ethics committees, and approval IDs**

| <b>Number of patients</b> | <b>Principal investigators</b> | <b>Participating sites</b>                                                                                                     | <b>Name of the ethics committee</b>                                                                      | <b>ID# of the approval</b> |
|---------------------------|--------------------------------|--------------------------------------------------------------------------------------------------------------------------------|----------------------------------------------------------------------------------------------------------|----------------------------|
| 57                        | Min Yan                        | Henan Breast Cancer Center, The Affiliated Cancer Hospital of Zhengzhou University & Henan Cancer Hospital, Zhengzhou, China   | Ethics Committee of Henan Cancer Hospital                                                                | 2019058-006                |
| 46                        | Wei Li                         | The First Hospital of Jilin University, Changchun, China                                                                       | Ethics Committee of The First Hospital of Jilin University                                               | 19Y025-009                 |
| 35                        | Quchang Ouyang                 | Hunan Cancer Hospital, The Affiliated Cancer Hospital of Xiangya School of Medicine, Central South University, Changsha, China | Ethics Committee of Hunan Cancer Hospital                                                                | 2022-793                   |
| 30                        | Zhongsheng Tong                | Tianjin Medical University Cancer Institute & Hospital, Tianjin, China                                                         | Ethics Committee of Tianjin Medical University Cancer Institute & Hospital                               | E20220520                  |
| 27                        | Yuee Teng                      | The First Hospital of China Medical University, Shenyang, China                                                                | Ethics Committee of The First Hospital of China Medical University                                       | 2019YL011-5H               |
| 22                        | Yongsheng Wang                 | Shandong Cancer Hospital & Institute, Jinan, China                                                                             | Ethics Committee of Shandong Cancer Hospital & Institute                                                 | SDZLEC2019-032-09          |
| 22                        | Shusen Wang                    | Sun Yat-sen University Cancer Center, Guangzhou, China                                                                         | Ethics Committee of Sun Yat-sen University Cancer Center                                                 | A2019-014-X06              |
| 21                        | Binghe Xu / Fei Ma             | Cancer Hospital Chinese Academy of Medical Sciences and Peking Union Medical College, Beijing, China                           | Ethics Committee of Cancer Hospital Chinese Academy of Medical Sciences and Peking Union Medical College | 19-012/1797                |
| 20                        | Cuizhi Geng                    | The Fourth Hospital of Hebei Medical University and Hebei Tumor Hospital, Shijiazhuang, China                                  | Ethics Committee of The Fourth Hospital of Hebei Medical University and Hebei Tumor Hospital             | 2019027-3                  |
| 20                        | Ting Luo                       | West China Hospital, Sichuan University, Chengdu, China                                                                        | Ethics Committee of West China Hospital                                                                  | 2019-6                     |

| <b>Number of patients</b> | <b>Principal investigators</b> | <b>Participating sites</b>                                                                        | <b>Name of the ethics committee</b>                                             | <b>ID# of the approval</b> |
|---------------------------|--------------------------------|---------------------------------------------------------------------------------------------------|---------------------------------------------------------------------------------|----------------------------|
| 20                        | Jincai Zhong                   | The First Affiliated Hospital of Guangxi Medical University, Nanning, China                       | Ethics Committee of The First Affiliated Hospital of Guangxi Medical University | 2022-065                   |
| 17                        | Qingyuan Zhang                 | Harbin Medical University Cancer Hospital, Harbin, China                                          | Ethics Committee of Harbin Medical University Cancer Hospital                   | 2019-36                    |
| 17                        | Qiang Liu                      | Sun Yat-sen Memorial Hospital, Sun Yat-sen University, Guangzhou, China                           | Ethics Committee of Sun Yat-sen Memorial Hospital                               | SYSYW-2022-072-01          |
| 16                        | Xiaohua Zeng                   | Affiliated Cancer Hospital of Chongqing University, Chongqing, China                              | Ethics Committee of Affiliated Cancer Hospital of Chongqing University          | CZLS2019022-G              |
| 16                        | Tao Sun                        | Liaoning Cancer Hospital & Institute, Shenyang, China                                             | Ethics Committee of Liaoning Cancer Hospital & Institute                        | 20220518                   |
| 16                        | Qinguo Mo                      | Guangxi Medical University Affiliated Tumor Hospital, Nanning, China                              | Ethics Committee of Guangxi Medical University Affiliated Tumor Hospital        | KS2022-112                 |
| 15                        | Hu Liu                         | The First Affiliated Hospital of USTC West District, Hefei, China                                 | Ethics Committee of The First Affiliated Hospital of USTC West District         | 2019-24-09                 |
| 14                        | Ying Cheng                     | Jilin Cancer Hospital, Changchun, China                                                           | Ethics Committee of Jilin Cancer Hospital                                       | 201902-008-08              |
| 13                        | Jing Cheng                     | Union Hospital, Tongji Medical College, Huazhong University of Science & Technology, Wuhan, China | Ethics Committee of Union Hospital                                              | 2019-44-4                  |
| 13                        | Xiaojia Wang                   | Zhejiang Cancer Hospital, Hangzhou, China                                                         | Ethics Committee of Zhejiang Cancer Hospital                                    | 2022-563                   |
| 12                        | Jianyun Nie                    | Yunnan Cancer Hospital, Kunming, China                                                            | Ethics Committee of Yunnan Cancer Hospital                                      | YW201916                   |
| 11                        | Jin Yang                       | The First Affiliated Hospital of Xi'an Jiaotong University, Xi'an, China                          | Ethics Committee of The First Affiliated Hospital of Xi'an Jiaotong University  | XJTU1AF2019LSY-47-4        |
| 11                        | Xinhong Wu                     | Hubei Cancer Hospital, Wuhan, China                                                               | Ethics Committee of Hubei Cancer Hospital                                       | 2022-137                   |
| 10                        | Xinshuai Wang                  | Henan Key Laboratory of Cancer Epigenetics,                                                       | Ethics Committee of The First Affiliated Hospital of                            | 2022-355                   |

| <b>Number of patients</b> | <b>Principal investigators</b> | <b>Participating sites</b>                                                                                                                                  | <b>Name of the ethics committee</b>                                                  | <b>ID# of the approval</b> |
|---------------------------|--------------------------------|-------------------------------------------------------------------------------------------------------------------------------------------------------------|--------------------------------------------------------------------------------------|----------------------------|
|                           |                                | Cancer Hospital, The First Affiliated Hospital, College of Clinical Medicine, Medical College of Henan University of Science and Technology, Luoyang, China | Medical College of Henan University of Science and Technology                        |                            |
| 9                         | Huiping Li                     | Beijing Cancer Hospital, Beijing, China                                                                                                                     | Ethics Committee of Beijing Cancer Hospital                                          | 2019YW32-ZY05              |
| 9                         | Changsheng Ye                  | Southern Medical University Nanfang Hospital, Guangzhou, China                                                                                              | Ethics Committee of Southern Medical University Nanfang Hospital                     | NFEC-201904-Y7-06          |
| 8                         | Qianjun Chen / Liping Ren      | Guangdong Provincial Hospital of Traditional Chinese Medicine, Guangzhou, China                                                                             | Ethics Committee of Guangdong Provincial Hospital of Traditional Chinese Medicine    | AF2019-022-13              |
| 8                         | Xian Wang                      | Zhejiang University School of Medicine Sir Run Run Shaw Hospital, Hangzhou, China                                                                           | Ethics Committee of Zhejiang University School of Medicine Sir Run Run Shaw Hospital | 2022-0072                  |
| 8                         | Kunwei Shen                    | Ruijin Hospital, Shanghai Jiao Tong University School of Medicine, Shanghai, China                                                                          | Ethics Committee of Ruijin Hospital                                                  | 2019-22-4                  |
| 8                         | Ru Zeng                        | The First Affiliated Hospital of Xiamen University, Xiamen, China                                                                                           | Ethics Committee of The First Affiliated Hospital of Xiamen University               | XMY-2019Y024-16            |
| 8                         | Xichun Hu                      | Fudan University Shanghai Cancer Center, Shanghai, China                                                                                                    | Ethics Committee of Fudan University Shanghai Cancer Center                          | 1904199-1-2208E            |
| 7                         | Yongmei Yin                    | The First Affiliated Hospital with Nanjing Medical University, Nanjing, China                                                                               | Ethics Committee of The First Affiliated Hospital with Nanjing Medical University    | 2019-MD-073.A5             |
| 6                         | Peifen Fu                      | The First Affiliated Hospital, College of Medicine, Zhejiang University, Hangzhou, China                                                                    | Ethics Committee of The First Affiliated Hospital                                    | 2022-231                   |
| 4                         | Lili Zhang                     | Jiangsu Cancer Hospital, Nanjing, China                                                                                                                     | Ethics Committee of Jiangsu Cancer Hospital                                          | 2019-001-05                |
| 4                         | Gang Hu                        | Sichuan Provincial People's Hospital, Chengdu, China                                                                                                        | Ethics Committee of Sichuan Provincial People's Hospital                             | 2019-9-6                   |

| <b>Number of patients</b> | <b>Principal investigators</b> | <b>Participating sites</b>                                             | <b>Name of the ethics committee</b>                                         | <b>ID# of the approval</b> |
|---------------------------|--------------------------------|------------------------------------------------------------------------|-----------------------------------------------------------------------------|----------------------------|
| 3                         | Liqun Jia                      | China-Japan Friendship Hospital, Beijing, China                        | Ethics Committee of China-Japan Friendship Hospital                         | 2019-32-Y04-36             |
| 3                         | Ai'min Zang                    | Affiliated Hospital of Hebei University, Baoding, China                | Ethics Committee of Affiliated Hospital of Hebei University                 | HDFY-LL-2022-115           |
| 2                         | Xianfu Liu                     | The First Affiliated Hospital of Bengbu Medical College, Bengbu, China | Ethics Committee of The First Affiliated Hospital of Bengbu Medical College | 2021-080X02                |
| 1                         | Qiuyun Xiong                   | The Third Hospital of Nanchang, Nanchang, China                        | Ethics Committee of The Third Hospital of Nanchang                          | 2019-10-1                  |
| 1                         | Li Sun                         | Xuzhou Central Hospital, Xuzhou, China                                 | Ethics Committee of Xuzhou Central Hospital                                 | XZXY-LY-20220316-2020068   |

**Table S2. Interruption of treatment for each component**

|                         | <b>Pyrotinib group</b> | <b>Placebo group</b> |
|-------------------------|------------------------|----------------------|
| Pyrotinib/Placebo, days |                        |                      |
| n                       | 297                    | 293                  |
| Mean (SD)               | 1.4 (5.0)              | 0.3 (0.8)            |
| Median (range)          | 0.2 (0.0–63.0)         | 0.0 (0.0–5.25)       |
| Trastuzumab, days       |                        |                      |
| n                       | 286*                   | 288*                 |
| Mean (SD)               | 21.9 (1.6)             | 21.6 (0.9)           |
| Median (range)          | 21.4 (19.6–39.0)       | 21.3 (20.0–26.0)     |
| Docetaxel, days         |                        |                      |
| n                       | 286*                   | 288*                 |
| Mean (SD)               | 21.8 (1.7)             | 21.6 (0.9)           |
| Median (range)          | 21.3 (19.6–39.0)       | 21.3 (20.0–26.4)     |

SD=standard deviation.

The data presented represent the "mean or median duration of treatment interruption per cycle." Pyrotinib/placebo is administered once daily continuously without rest periods. For each participant, "duration of treatment interruption per cycle" is calculated by summing the total treatment interruption time during their treatment period and dividing it by the total number of treatment cycles, each calculated as 21 days. Trastuzumab and docetaxel are administered once every 21 days. For each participant, "duration of treatment interruption per cycle" is calculated by summing the total treatment interruption time during their treatment period and dividing it by the total number of recorded treatment cycles. The asterisk (\*) denotes the number of participants excluded those who received only 1 cycle of trastuzumab or docetaxel.



**Table S3. Treatment related serious adverse events**

|                                      | <b>Pyrotinib group<br/>(n=297)</b> | <b>Placebo group<br/>(n=293)</b> |
|--------------------------------------|------------------------------------|----------------------------------|
| Total                                | 74 (24.9)                          | 18 (6.1)                         |
| Diarrhoea                            | 15 (5.1)                           | 0                                |
| Alanine aminotransferase increased   | 10 (3.4)                           | 1 (0.3)                          |
| Febrile neutropenia                  | 9 (3.0)                            | 5 (1.7)                          |
| Neutrophil count decreased           | 6 (2.0)                            | 1 (0.3)                          |
| Vomiting                             | 5 (1.7)                            | 0                                |
| White blood cell count decreased     | 5 (1.7)                            | 0                                |
| Aspartate aminotransferase increased | 5 (1.7)                            | 0                                |
| Anaemia                              | 4 (1.3)                            | 1 (0.3)                          |
| Hypokalaemia                         | 4 (1.3)                            | 0                                |
| Decreased appetite                   | 4 (1.3)                            | 0                                |
| Pneumonia                            | 4 (1.3)                            | 2 (0.7)                          |
| Intestinal obstruction               | 3 (1.0)                            | 0                                |
| Nausea                               | 2 (0.7)                            | 1 (0.3)                          |
| Platelet count decreased             | 2 (0.7)                            | 0                                |
| Acute kidney injury                  | 2 (0.7)                            | 0                                |
| Abdominal pain                       | 1 (0.3)                            | 0                                |
| Gastrointestinal haemorrhage         | 1 (0.3)                            | 0                                |
| Gastritis                            | 1 (0.3)                            | 0                                |
| Tooth development disorder           | 1 (0.3)                            | 0                                |
| Electrocardiogram QT prolonged       | 1 (0.3)                            | 0                                |
| Hypoalbuminemia                      | 1 (0.3)                            | 0                                |
| Electrolyte imbalance                | 1 (0.3)                            | 0                                |
| Cystitis                             | 1 (0.3)                            | 0                                |
| Cellulitis                           | 1 (0.3)                            | 0                                |
| Carbuncle                            | 1 (0.3)                            | 0                                |
| Depressed level of consciousness     | 1 (0.3)                            | 0                                |
| Syncope                              | 1 (0.3)                            | 0                                |
| Neuropathy peripheral                | 1 (0.3)                            | 0                                |
| Chronic kidney disease               | 1 (0.3)                            | 0                                |
| Pneumonitis                          | 1 (0.3)                            | 0                                |
| Pulmonary fibrosis                   | 1 (0.3)                            | 0                                |
| Asthenia                             | 1 (0.3)                            | 0                                |
| Oedema peripheral                    | 1 (0.3)                            | 0                                |
| Arrhythmia                           | 1 (0.3)                            | 0                                |
| Left ventricular dysfunction         | 1 (0.3)                            | 0                                |
| Cholecystitis                        | 1 (0.3)                            | 0                                |
| Spinal compression fracture          | 1 (0.3)                            | 0                                |
| Fistula                              | 1 (0.3)                            | 0                                |
| Hypertension                         | 1 (0.3)                            | 0                                |
| Post procedural infection            | 0                                  | 1 (0.3)                          |

|                            | <b>Pyrotinib group<br/>(n=297)</b> | <b>Placebo group<br/>(n=293)</b> |
|----------------------------|------------------------------------|----------------------------------|
| Infection                  | 0                                  | 1 (0.3)                          |
| Diabetic hyperosmolar coma | 0                                  | 1 (0.3)                          |
| Pleural effusion           | 0                                  | 2 (0.7)                          |
| Ventricular extrasystoles  | 0                                  | 1 (0.3)                          |
| Sinus tachycardia          | 0                                  | 1 (0.3)                          |
| Hypersensitivity           | 0                                  | 1 (0.3)                          |

Data are n (%).

**Table S4. Treatment related adverse events that led to treatment discontinuation**

|                                  | <b>Pyrotinib group<br/>(n=297)</b> | <b>Placebo group<br/>(n=293)</b> |
|----------------------------------|------------------------------------|----------------------------------|
| Any                              | 39 (13.1)                          | 21 (7.2)                         |
| Anaemia                          | 7 (2.4)                            | 1 (0.3)                          |
| Hand-foot syndrome               | 3 (1.0)                            | 3 (1.0)                          |
| Oedema peripheral                | 3 (1.0)                            | 3 (1.0)                          |
| Asthenia                         | 2 (0.7)                            | 2 (0.7)                          |
| Weight decreased                 | 2 (0.7)                            | 0                                |
| Platelet count decreased         | 2 (0.7)                            | 0                                |
| Intestinal obstruction           | 2 (0.7)                            | 0                                |
| Pain in extremity                | 2 (0.7)                            | 0                                |
| Rash                             | 1 (0.3)                            | 2 (0.7)                          |
| Hypoesthesia                     | 1 (0.3)                            | 2 (0.7)                          |
| Infusion related reaction        | 1 (0.3)                            | 1 (0.3)                          |
| Pneumonia                        | 1 (0.3)                            | 1 (0.3)                          |
| Onychomadesis                    | 1 (0.3)                            | 1 (0.3)                          |
| Nail disorder                    | 1 (0.3)                            | 1 (0.3)                          |
| Electrocardiogram QT prolonged   | 1 (0.3)                            | 1 (0.3)                          |
| Decreased appetite               | 1 (0.3)                            | 1 (0.3)                          |
| White blood cell count decreased | 1 (0.3)                            | 0                                |
| Ejection fraction decreased      | 1 (0.3)                            | 0                                |
| Blood creatinine increased       | 1 (0.3)                            | 0                                |
| Neutrophil count decreased       | 1 (0.3)                            | 0                                |
| Cystatin C increased             | 1 (0.3)                            | 0                                |
| Nausea                           | 1 (0.3)                            | 0                                |
| Diarrhoea                        | 1 (0.3)                            | 0                                |
| Vomiting                         | 1 (0.3)                            | 0                                |
| Abdominal pain upper             | 1 (0.3)                            | 0                                |
| Gastrointestinal haemorrhage     | 1 (0.3)                            | 0                                |
| Cellulitis                       | 1 (0.3)                            | 0                                |
| Paronychia                       | 1 (0.3)                            | 0                                |
| Carbuncle                        | 1 (0.3)                            | 0                                |
| Hypoalbuminemia                  | 1 (0.3)                            | 0                                |
| Hypocalcaemia                    | 1 (0.3)                            | 0                                |
| Hyponatremia                     | 1 (0.3)                            | 0                                |
| Epistaxis                        | 1 (0.3)                            | 0                                |
| Pulmonary fibrosis               | 1 (0.3)                            | 0                                |
| Ventricular arrhythmia           | 1 (0.3)                            | 0                                |
| Left ventricular dysfunction     | 1 (0.3)                            | 0                                |
| Conjunctival hyperaemia          | 1 (0.3)                            | 0                                |
| Lacrimation increased            | 1 (0.3)                            | 0                                |
| Acute kidney injury              | 1 (0.3)                            | 0                                |

|                     | <b>Pyrotinib group<br/>(n=297)</b> | <b>Placebo group<br/>(n=293)</b> |
|---------------------|------------------------------------|----------------------------------|
| Hypersensitivity    | 0                                  | 2 (0.7)                          |
| Nail discoloration  | 0                                  | 1 (0.3)                          |
| Localised oedema    | 0                                  | 1 (0.3)                          |
| Cardiac dysfunction | 0                                  | 1 (0.3)                          |

Data are n (%).

**Table S5. Summary of data on diarrhoea**

|                                                                          | <b>Pyrotinib group<br/>(n=297)</b> | <b>Placebo group<br/>(n=293)</b> |
|--------------------------------------------------------------------------|------------------------------------|----------------------------------|
| Diarrhoea incidence                                                      | 293 (98.7)                         | 159 (54.3)                       |
| Grade 1                                                                  | 36 (12.1)                          | 100 (34.1)                       |
| Grade 2                                                                  | 118 (39.7)                         | 48 (16.4)                        |
| Grade 3                                                                  | 138 (46.5)                         | 11 (3.8)                         |
| Grade 4/5                                                                | 0                                  | 0                                |
| Unknown*                                                                 | 1 (0.3)                            | 0                                |
| Time to onset, median (IQR), days                                        |                                    |                                  |
| All grade                                                                | 3 (2–5)                            | 6 (4–24)                         |
| Grade 3                                                                  | 8 (6–15)                           | 71 (23–178)                      |
| Duration per event, median (IQR), days                                   |                                    |                                  |
| All grade                                                                | 2 (1–3)                            | 2 (1–4)                          |
| Grade 3                                                                  | 1 (1–1)                            | 1 (1–1)                          |
| Having diarrhoea >3 times                                                |                                    |                                  |
| All grade                                                                | 263 (88.6)                         | 54 (18.4)                        |
| Grade 3                                                                  | 41 (13.8)                          | 0                                |
| Cumulative duration, median (IQR), days                                  |                                    |                                  |
| Grade 3                                                                  | 3 (2–6)                            | 1 (1–2)                          |
| Treatment or dose modification for pyrotinib or placebo due to diarrhoea |                                    |                                  |
| Treatment interruption                                                   | 74 (24.9)                          | 2 (0.7)                          |
| Dose reduction                                                           | 51 (17.2)                          | 0                                |
| Treatment discontinuation                                                | 1 (0.3)                            | 0                                |
| Treatment or dose modification for trastuzumab due to diarrhoea          |                                    |                                  |
| Treatment discontinuation                                                | 1 (0.3)                            | 0                                |
| Treatment or dose modification for docetaxel due to diarrhoea            |                                    |                                  |
| Dose reduction                                                           | 1 (0.3)                            | 0                                |
| Treatment discontinuation                                                | 1 (0.3)                            | 0                                |

Data are n (%), unless otherwise specified.

IQR=interquartile range.

\*Medical record card of follow-up for this patient was lost, so the detailed information about diarrhoea were unknown.
